# Supplementary material
Source: PubMed Central journal article supplement (PMC6909730)
Supplement: Supp_Fig2.pdf [file Supp_Fig2.pdf]

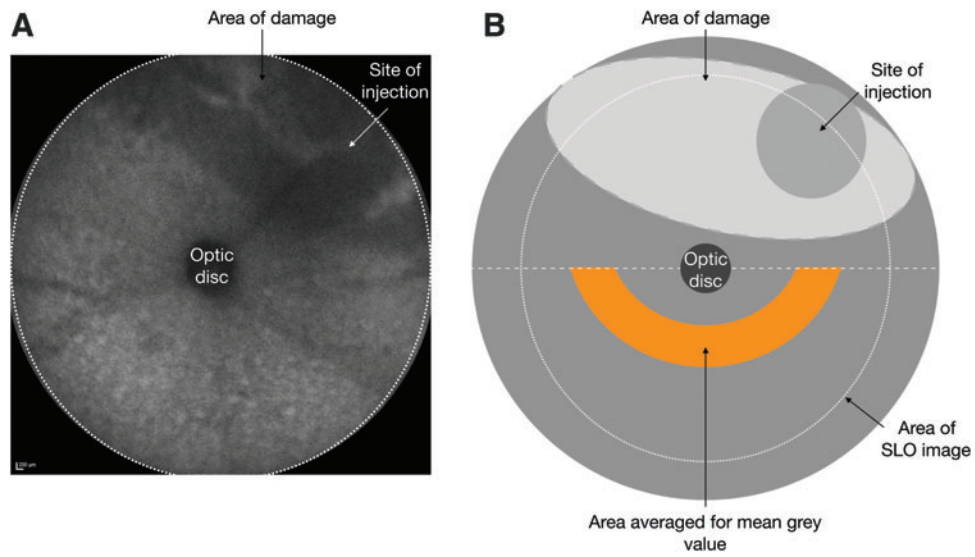

**Supplementary Figure S2.** Representative 790 nm scanning laser ophthalmoscopy image from a dual vector injected *Abca4*<sup>-/-</sup> eye. **(A)** A region of disrupted autofluorescence was consistently evident in the superior region of injected eyes regardless of the injection material and was therefore identified as injection-related retinal damage/thinning, which did not extend to the inferior retina. **(B)** Schematic indicating the ring measurement used for extracting autofluorescence mean grey values. The central zone was chosen because it was close to the subretinal injection site and also because central zones were less.

---
